# Supplementary material for: Anaesthesia care providers employed in humanitarian settings by Médecins Sans Frontières: a retrospective observational study of 173 084 surgical cases over 10 years
Source: BMJ Open. 2020 Mar 4;10(3):e034891. doi: 10.1136/bmjopen-2019-034891 (PMC7059447; doi:10.1136/bmjopen-2019-034891)
Supplement: Supplementary data [file bmjopen-2019-034891supp001.pdf]

**Anaesthesia care providers employed in humanitarian settings by Médecins Sans  
Frontières: A retrospective observational study of 173,084 surgical cases over 10 years**

**APPENDIX**

Table of Contents

Appendix Table 1: Variables used in the study

Appendix Table 2: surgical projects in health care gap settings in the WHO SEA region (2 in total)

Appendix Table 3: Surgical projects in natural disaster settings (5 in total)

Appendix Table 4: Surgical groupings as used in main table 2 (case-level data)

Missing data Table 1: Number of missing values within each variable

Missing data Figure 2: Proportion of missing data in each surgical project

Missing data Table 2: overview of available data

Appendix Table 1: Variables used in the study

| Key characteristic group     | Name of variable         | Type of data          | Description of data                                                                                                                                                                                                                                                                                                                                                                                                                                                                                                                                                                                                                                          | Source                  |                |                     |                              |      |                      |    |                      |         |            |                      |     |                 |      |            |    |            |                                   |
|------------------------------|--------------------------|-----------------------|--------------------------------------------------------------------------------------------------------------------------------------------------------------------------------------------------------------------------------------------------------------------------------------------------------------------------------------------------------------------------------------------------------------------------------------------------------------------------------------------------------------------------------------------------------------------------------------------------------------------------------------------------------------|-------------------------|----------------|---------------------|------------------------------|------|----------------------|----|----------------------|---------|------------|----------------------|-----|-----------------|------|------------|----|------------|-----------------------------------|
| Patient                      | Age                      | Continuous            | For patients below the age of 2 (typed in original data collection sheet as days and months), the age has been converted for analysis to a fraction of a year.                                                                                                                                                                                                                                                                                                                                                                                                                                                                                               | Case-level routine data |                |                     |                              |      |                      |    |                      |         |            |                      |     |                 |      |            |    |            |                                   |
|                              | Gender                   | Categorical (binary)  | Either male or female                                                                                                                                                                                                                                                                                                                                                                                                                                                                                                                                                                                                                                        | Case-level routine data |                |                     |                              |      |                      |    |                      |         |            |                      |     |                 |      |            |    |            |                                   |
|                              | Date of procedure        | Continuous            | Date operation took place                                                                                                                                                                                                                                                                                                                                                                                                                                                                                                                                                                                                                                    | Case-level routine data |                |                     |                              |      |                      |    |                      |         |            |                      |     |                 |      |            |    |            |                                   |
|                              | ASA grade                | Ordinal               | American Society of Anaesthesiologists physical status classification system (ASA). Discrete numeric scale between 1 and 5 (1 = normal healthy patient, 5 = moribund patient expected not to survive without surgery) of the patient’s physical health prior to surgery.                                                                                                                                                                                                                                                                                                                                                                                     | Case-level routine data |                |                     |                              |      |                      |    |                      |         |            |                      |     |                 |      |            |    |            |                                   |
|                              | Cause of hospitalisation | Categorical (nominal) | 3 letter code used as defined by MSF-OCB operational departmental guideline. A total of 24 codes available, and grouped into 4 distinct categories: <ul style="list-style-type: none"><li>- Accidental trauma</li><li>- Violent trauma</li><li>- Obstetric</li><li>- Other (including but not limited to tropical disease, tumours, obstruction)</li></ul>                                                                                                                                                                                                                                                                                                   | Case-level routine data |                |                     |                              |      |                      |    |                      |         |            |                      |     |                 |      |            |    |            |                                   |
| Surgery                      | Urgency                  | Categorical (ordinal) | 3 values available, relating to how soon the surgical procedure has to occur: <ul style="list-style-type: none"><li>- “Urgent” (labelled “emergent” in manuscript) = requiring immediate surgery</li><li>- “Delayed” (labelled “urgent” in manuscript) = requiring surgery during current hospital admission</li><li>- “Planned” (labelled “elective” in manuscript) = elective surgery</li></ul>                                                                                                                                                                                                                                                            | Case-level routine data |                |                     |                              |      |                      |    |                      |         |            |                      |     |                 |      |            |    |            |                                   |
|                              | Order                    | Categorical (ordinal) | 3 codes available, relating to whether patient has had surgery before during admission: <ul style="list-style-type: none"><li>- “First” = first time entering theatre</li><li>- “Unplanned” = unplanned return to theatre</li><li>- “Re-intervention” = planned return to theatre</li></ul>                                                                                                                                                                                                                                                                                                                                                                  | Case-level routine data |                |                     |                              |      |                      |    |                      |         |            |                      |     |                 |      |            |    |            |                                   |
|                              | Procedure – Main group   | Categorical (nominal) | 2 letter code used as defined by MSF-OCB operational department guidelines. A total of 36 procedures codes available, and grouped into the main categories of surgery. See appendix table 4 for full breakdown.                                                                                                                                                                                                                                                                                                                                                                                                                                              | Case-level routine data |                |                     |                              |      |                      |    |                      |         |            |                      |     |                 |      |            |    |            |                                   |
|                              | Lead surgical provider   | Categorical (nominal) | A merged variable, based on the presence of local and expatriate providers as outlined below. MD signifies a physician without surgical qualifications but with surgical skills. <table><tr><td></td><td>Local provider</td><td>Expatriate provider</td></tr><tr><td rowspan="4">General &amp; specialist surgeon</td><td>None</td><td>General &amp; Specialist</td></tr><tr><td>MD</td><td>General &amp; Specialist</td></tr><tr><td>General</td><td>Specialist</td></tr><tr><td>General &amp; Specialist</td><td>Any</td></tr><tr><td rowspan="2">Specialist only</td><td>None</td><td>Specialist</td></tr><tr><td>MD</td><td>Specialist</td></tr></table> |                         | Local provider | Expatriate provider | General & specialist surgeon | None | General & Specialist | MD | General & Specialist | General | Specialist | General & Specialist | Any | Specialist only | None | Specialist | MD | Specialist | Programme-level routine data (MT) |
|                              |                          | Local provider        | Expatriate provider                                                                                                                                                                                                                                                                                                                                                                                                                                                                                                                                                                                                                                          |                         |                |                     |                              |      |                      |    |                      |         |            |                      |     |                 |      |            |    |            |                                   |
| General & specialist surgeon | None                     | General & Specialist  |                                                                                                                                                                                                                                                                                                                                                                                                                                                                                                                                                                                                                                                              |                         |                |                     |                              |      |                      |    |                      |         |            |                      |     |                 |      |            |    |            |                                   |
|                              | MD                       | General & Specialist  |                                                                                                                                                                                                                                                                                                                                                                                                                                                                                                                                                                                                                                                              |                         |                |                     |                              |      |                      |    |                      |         |            |                      |     |                 |      |            |    |            |                                   |
|                              | General                  | Specialist            |                                                                                                                                                                                                                                                                                                                                                                                                                                                                                                                                                                                                                                                              |                         |                |                     |                              |      |                      |    |                      |         |            |                      |     |                 |      |            |    |            |                                   |
|                              | General & Specialist     | Any                   |                                                                                                                                                                                                                                                                                                                                                                                                                                                                                                                                                                                                                                                              |                         |                |                     |                              |      |                      |    |                      |         |            |                      |     |                 |      |            |    |            |                                   |
| Specialist only              | None                     | Specialist            |                                                                                                                                                                                                                                                                                                                                                                                                                                                                                                                                                                                                                                                              |                         |                |                     |                              |      |                      |    |                      |         |            |                      |     |                 |      |            |    |            |                                   |
|                              | MD                       | Specialist            |                                                                                                                                                                                                                                                                                                                                                                                                                                                                                                                                                                                                                                                              |                         |                |                     |                              |      |                      |    |                      |         |            |                      |     |                 |      |            |    |            |                                   |
|                              |                          |                       |                                                                                                                                                                                                                                                                                                                                                                                                                                                                                                                                                                                                                                                              |                         |                |                     |                              |      |                      |    |                      |         |            |                      |     |                 |      |            |    |            |                                   |
|                              |                          |                       |                                                                                                                                                                                                                                                                                                                                                                                                                                                                                                                                                                                                                                                              |                         |                |                     |                              |      |                      |    |                      |         |            |                      |     |                 |      |            |    |            |                                   |
|                              |                          |                       |                                                                                                                                                                                                                                                                                                                                                                                                                                                                                                                                                                                                                                                              |                         |                |                     |                              |      |                      |    |                      |         |            |                      |     |                 |      |            |    |            |                                   |

|                                           |                                   |                       |                                                                                                                                                                                                                                                                                                                                                                                                                                                                                                                                                                                                                 |                    |                                   |                |                     |                                      |    |      |    |    |    |    |      |    |                             |    |      |    |    |      |    |                                           |    |      |
|-------------------------------------------|-----------------------------------|-----------------------|-----------------------------------------------------------------------------------------------------------------------------------------------------------------------------------------------------------------------------------------------------------------------------------------------------------------------------------------------------------------------------------------------------------------------------------------------------------------------------------------------------------------------------------------------------------------------------------------------------------------|--------------------|-----------------------------------|----------------|---------------------|--------------------------------------|----|------|----|----|----|----|------|----|-----------------------------|----|------|----|----|------|----|-------------------------------------------|----|------|
|                                           |                                   |                       | Specialist                                                                                                                                                                                                                                                                                                                                                                                                                                                                                                                                                                                                      | Specialist or none |                                   |                |                     |                                      |    |      |    |    |    |    |      |    |                             |    |      |    |    |      |    |                                           |    |      |
|                                           | General only                      | None                  | General                                                                                                                                                                                                                                                                                                                                                                                                                                                                                                                                                                                                         |                    |                                   |                |                     |                                      |    |      |    |    |    |    |      |    |                             |    |      |    |    |      |    |                                           |    |      |
|                                           |                                   | MD                    | General                                                                                                                                                                                                                                                                                                                                                                                                                                                                                                                                                                                                         |                    |                                   |                |                     |                                      |    |      |    |    |    |    |      |    |                             |    |      |    |    |      |    |                                           |    |      |
|                                           |                                   | General               | General or none                                                                                                                                                                                                                                                                                                                                                                                                                                                                                                                                                                                                 |                    |                                   |                |                     |                                      |    |      |    |    |    |    |      |    |                             |    |      |    |    |      |    |                                           |    |      |
|                                           | MD                                | MD                    | None                                                                                                                                                                                                                                                                                                                                                                                                                                                                                                                                                                                                            |                    |                                   |                |                     |                                      |    |      |    |    |    |    |      |    |                             |    |      |    |    |      |    |                                           |    |      |
|                                           | Theatre time (min)                | Continuous            | Time in minutes the patient was occupying theatre. This included anaesthetic and surgical time, as well as any recovery of patient, which occurred in theatre.                                                                                                                                                                                                                                                                                                                                                                                                                                                  |                    | Case-level routine data           |                |                     |                                      |    |      |    |    |    |    |      |    |                             |    |      |    |    |      |    |                                           |    |      |
|                                           | Intra-operative mortality         | Categorical (binary)  | Whether the patient was dead or alive by the time they left recovery. For the purpose of the study, this is considered as intraoperative mortality.                                                                                                                                                                                                                                                                                                                                                                                                                                                             |                    | Case-level routine data           |                |                     |                                      |    |      |    |    |    |    |      |    |                             |    |      |    |    |      |    |                                           |    |      |
| Anaesthesia                               | Choice of anaesthesia             | Categorical (nominal) | List of 7 codes of anaesthesia that can be provided. Only a single code can be used for a surgical procedure:<br>- Local anaesthesia<br>- Regional anaesthesia<br>- Spinal anaesthesia<br>- General anaesthesia without intubation or muscle relaxant<br>- General anaesthesia with intubation and/or muscle relaxant<br>- Combined anaesthesia (if more than one code need to be used, e.g. spinal anaesthesia + general anaesthesia)<br>- Other anaesthesia, e.g. sedation                                                                                                                                    |                    | Case-level routine data           |                |                     |                                      |    |      |    |    |    |    |      |    |                             |    |      |    |    |      |    |                                           |    |      |
|                                           | Lead anaesthesia provider         | Categorical (nominal) | A merged variable, based on the presence of local and expatriate providers as outlined below. <table><tr><td></td><td>Local provider</td><td>Expatriate provider</td></tr><tr><td rowspan="4">Physician anaesthesiologist (PA) led</td><td>PA</td><td>none</td></tr><tr><td>NA</td><td>PA</td></tr><tr><td>UA</td><td>PA</td></tr><tr><td>None</td><td>PA</td></tr><tr><td rowspan="3">Nurse anaesthetist (NA) led</td><td>NA</td><td>none</td></tr><tr><td>UA</td><td>NA</td></tr><tr><td>None</td><td>NA</td></tr><tr><td>Uncertified anaesthetic provider (UA) led</td><td>UA</td><td>None</td></tr></table> |                    |                                   | Local provider | Expatriate provider | Physician anaesthesiologist (PA) led | PA | none | NA | PA | UA | PA | None | PA | Nurse anaesthetist (NA) led | NA | none | UA | NA | None | NA | Uncertified anaesthetic provider (UA) led | UA | None |
|                                           | Local provider                    | Expatriate provider   |                                                                                                                                                                                                                                                                                                                                                                                                                                                                                                                                                                                                                 |                    |                                   |                |                     |                                      |    |      |    |    |    |    |      |    |                             |    |      |    |    |      |    |                                           |    |      |
| Physician anaesthesiologist (PA) led      | PA                                | none                  |                                                                                                                                                                                                                                                                                                                                                                                                                                                                                                                                                                                                                 |                    |                                   |                |                     |                                      |    |      |    |    |    |    |      |    |                             |    |      |    |    |      |    |                                           |    |      |
|                                           | NA                                | PA                    |                                                                                                                                                                                                                                                                                                                                                                                                                                                                                                                                                                                                                 |                    |                                   |                |                     |                                      |    |      |    |    |    |    |      |    |                             |    |      |    |    |      |    |                                           |    |      |
|                                           | UA                                | PA                    |                                                                                                                                                                                                                                                                                                                                                                                                                                                                                                                                                                                                                 |                    |                                   |                |                     |                                      |    |      |    |    |    |    |      |    |                             |    |      |    |    |      |    |                                           |    |      |
|                                           | None                              | PA                    |                                                                                                                                                                                                                                                                                                                                                                                                                                                                                                                                                                                                                 |                    |                                   |                |                     |                                      |    |      |    |    |    |    |      |    |                             |    |      |    |    |      |    |                                           |    |      |
| Nurse anaesthetist (NA) led               | NA                                | none                  |                                                                                                                                                                                                                                                                                                                                                                                                                                                                                                                                                                                                                 |                    |                                   |                |                     |                                      |    |      |    |    |    |    |      |    |                             |    |      |    |    |      |    |                                           |    |      |
|                                           | UA                                | NA                    |                                                                                                                                                                                                                                                                                                                                                                                                                                                                                                                                                                                                                 |                    |                                   |                |                     |                                      |    |      |    |    |    |    |      |    |                             |    |      |    |    |      |    |                                           |    |      |
|                                           | None                              | NA                    |                                                                                                                                                                                                                                                                                                                                                                                                                                                                                                                                                                                                                 |                    |                                   |                |                     |                                      |    |      |    |    |    |    |      |    |                             |    |      |    |    |      |    |                                           |    |      |
| Uncertified anaesthetic provider (UA) led | UA                                | None                  |                                                                                                                                                                                                                                                                                                                                                                                                                                                                                                                                                                                                                 |                    |                                   |                |                     |                                      |    |      |    |    |    |    |      |    |                             |    |      |    |    |      |    |                                           |    |      |
| Setting                                   | Type of care provided by hospital | Categorical (nominal) | Overall type of provision provided during surgical project, based on MSF-OCB brief. 9 separate categories grouped into 5:<br>- Emergency only<br>- Capacity to perform both emergency and elective surgery<br>- Maternity care only<br>- Trauma care only<br>- Other specific care provision (wound care, trauma and surgical care, obstetric fistula care, and surgical care of typhoid related complications)                                                                                                                                                                                                 |                    | Programme-level routine data (MT) |                |                     |                                      |    |      |    |    |    |    |      |    |                             |    |      |    |    |      |    |                                           |    |      |

|  |                |                       |                                                                                                                                                                                                                                                                                                                                                                                                                                                                                                                                                                                                                         |                                   |
|--|----------------|-----------------------|-------------------------------------------------------------------------------------------------------------------------------------------------------------------------------------------------------------------------------------------------------------------------------------------------------------------------------------------------------------------------------------------------------------------------------------------------------------------------------------------------------------------------------------------------------------------------------------------------------------------------|-----------------------------------|
|  | WHO region     | Categorical (nominal) | The location of each mission was labelled according to the region codes used by the World Health Organisation:<br>- AFR<br>- EMR<br>- SEAR<br>- AMR<br>- WPR                                                                                                                                                                                                                                                                                                                                                                                                                                                            | WHO                               |
|  | Setting        | Categorical (binary)  | 3 variables:<br>- Conflict<br>- Natural disaster<br>- Health care gaps                                                                                                                                                                                                                                                                                                                                                                                                                                                                                                                                                  | Programme-level routine data (MT) |
|  | Hospital level | Ordinal (Categorical) | 4 distinct categories as per MSF-OCB surgical policy guidelines:<br>- Sole remit hospital = hospital that provides care for a specific purpose (i.e. not necessarily a quaternary referral hospital, but a surgical setup for a specific indication). Examples include: Trauma centre, Maternity centre, Fistula repair camp.<br>- Referral hospital = provincial hospital, considered tertiary referral hospital.<br>- District hospital = can manage most, but will refer complex cases on to referral hospitals.<br>- Health centres = small rural health centres with capacity to perform basic surgical operations | Programme-level routine data (MT) |
|  | Site ID        | Character             | Anonymous unique code for each site                                                                                                                                                                                                                                                                                                                                                                                                                                                                                                                                                                                     | produced in R 3.6                 |

**Appendix Table 2: surgical projects in health care gap settings in the WHO SEA region (2 in total)**

|                                                                    |                                                                                        |
|--------------------------------------------------------------------|----------------------------------------------------------------------------------------|
| <b>Type of anaesthesia provider</b>                                | Physician anaesthetist only                                                            |
| <b>Type of hospital</b>                                            | - District hospital<br>- Health centre                                                 |
| <b>Type of care provided by surgical project (No. of projects)</b> | - Capacity to perform both emergency and elective surgery<br>- Filariasis-related care |
| <b>Total duration, months</b>                                      | 19                                                                                     |
| <b>Type of surgical provider for entire duration</b>               | - General & specialty surgeons<br>- General surgeon only                               |
| <b>Total number of all cases, No.</b>                              | 815                                                                                    |
| <b>Main cause for hospitalisation, No. (%)</b>                     | - Other, 482 (59)                                                                      |
| <b>Main category of surgery, No. (%)</b>                           | - Minor Surgery, 507 (62)                                                              |
| <b>Intra-operative mortality, No. (%)</b>                          | 2 (0.2)                                                                                |

Appendix Table 3: Surgical projects in natural disaster settings (5 in total)

|                                                             |                                                                                                                 |
|-------------------------------------------------------------|-----------------------------------------------------------------------------------------------------------------|
| Type of anaesthesia provider                                | Physician anaesthetist only                                                                                     |
| Type of hospital                                            | - District<br>- Sole remit hospital                                                                             |
| Type of care provided by surgical project (No. of projects) | - Capacity to perform both emergency and elective surgery (2)<br>- Trauma care only (1)<br>- Emergency only (2) |
| Total duration, months                                      | 40                                                                                                              |
| Presence of surgical provider, months                       |                                                                                                                 |
| - General and specialty surgeons                            | 23                                                                                                              |
| - General surgeon only                                      | 16                                                                                                              |
| - Specialty surgeon only                                    | 1                                                                                                               |
| Total number of all cases, No. (%)                          | 3108                                                                                                            |
| Main cause for hospitalisation, No. (%)                     | - Other, 1144 (37)                                                                                              |
| Main category of surgery, No. (%)                           | - Minor surgery, 1608 (52)                                                                                      |
| Intra-operative mortality, No. (%)                          | 9 (0.3)                                                                                                         |

Appendix Table 4: Surgical groupings as used in main table 2 (case-level data)

| Surgical grouping                                            | Examples of types of surgery included                                                                                                                                                                                                                                                                                                                                                                                                                                                                                                                 |
|--------------------------------------------------------------|-------------------------------------------------------------------------------------------------------------------------------------------------------------------------------------------------------------------------------------------------------------------------------------------------------------------------------------------------------------------------------------------------------------------------------------------------------------------------------------------------------------------------------------------------------|
| Minor surgery                                                | <ul style="list-style-type: none"> <li>• Simple wound treatment</li> <li>• Insertion/removal of drain</li> <li>• Burns dressing change</li> <li>• Wound debridement</li> <li>• Removal of foreign body</li> <li>• Amputation of digits or toes</li> </ul> <p>Incl. procedure codes with median operative time &lt; 45min within the dataset:</p> <ul style="list-style-type: none"> <li>• Curettage post delivery (GP)</li> <li>• Reduction of fractures (OR)</li> <li>• Removal of osteosynthesis (OX)</li> <li>• Ophthalmic surgery (SO)</li> </ul> |
| Caesarean section                                            | <ul style="list-style-type: none"> <li>• Caesarean section only</li> </ul>                                                                                                                                                                                                                                                                                                                                                                                                                                                                            |
| Visceral surgery                                             | <ul style="list-style-type: none"> <li>• Exploratory laparotomy</li> <li>• Hernia repair</li> <li>• Resection/repair solid organs (e.g. spleen/liver) or gut</li> </ul>                                                                                                                                                                                                                                                                                                                                                                               |
| Orthopaedic surgery                                          | <ul style="list-style-type: none"> <li>• External or internal fixation of fracture</li> <li>• Surgery to any joint</li> <li>• Limb amputation (excluding digits or toes)</li> <li>• Curettage for osteomyelitis</li> </ul>                                                                                                                                                                                                                                                                                                                            |
| Obstetric & gynaecological surgery (excl. Caesarean section) | <ul style="list-style-type: none"> <li>• Management of ectopic pregnancy</li> <li>• Obstetric fistula repair</li> <li>• Hysterectomy</li> </ul>                                                                                                                                                                                                                                                                                                                                                                                                       |
| Specialties                                                  | <ul style="list-style-type: none"> <li>• Urology</li> <li>• Vascular surgery</li> <li>• Plastic and reconstructive surgery</li> <li>• Ear, nose and throat surgery</li> <li>• Neurosurgery</li> <li>• Thoracic surgery</li> <li>• Maxillofacial surgery</li> <li>• Other specialized surgery</li> </ul>                                                                                                                                                                                                                                               |

Modified from the original surgical groupings outlined in the “MSF-OCB Operating Department Data Collection Guidelines (2015)”.

Missing data Table 1: Number of missing values within each variable

| Variable                  | Number missing |
|---------------------------|----------------|
| ASA                       | 3232           |
| Intra-operative mortality | 2154           |
| Time in theatre           | 1922           |
| Age                       | 47             |
| Main procedure            | 5              |
| Choice of anaesthesia     | 2              |
| Gender                    | 0              |
| Date of procedure         | 0              |
| Cause of hospitalisation  | 0              |
| Urgency                   | 0              |
| Order                     | 0              |
| Surgical provider         | 0              |
| Anaesthesia provider      | 0              |
| Who region                | 0              |
| Setting                   | 0              |
| Type of hospital          | 0              |
| Type of care provided     | 0              |
| Site ID                   | 0              |

histogram showing all surgical projects (along x-axis), sorted according to setting, showing proportion of missing cases with any missing data (red indicates data with at least one missing value)

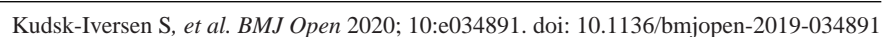

Missing data Table 2: overview of available data

| Variable                           | Value      |
|------------------------------------|------------|
| Median age, years (IQR)            | 26 (18-36) |
| Female, no. (%)                    | 2963 (52)  |
| Median ASA (IQR)                   | 1 (1-2)    |
| Emergent surgery, no. (%)          | 2277 (40)  |
| Cause for hospitalisation, no. (%) |            |
| - Obstetric                        | 1188       |
| - Any trauma                       | 2074       |
| - Other                            | 2468       |
| Main surgical procedure            |            |
| - Minor surgery                    | 2854       |
| - Caesarean section                | 746        |
| - Visceral surgery                 | 1408       |
| - Obstetric and gynaecology        | 503        |
| - Orthopaedics                     | 177        |
| - Other specialty surgery          | 37         |
| Intraoperative mortality           |            |
| - Alive                            | 3563       |
| - Died                             | 13         |
| Median theatre time, minutes (IQR) | 45 (35-60) |
| Setting                            |            |
| - Health care gap                  | 3359       |
| - Conflict                         | 1443       |
| - Natural disaster                 | 928        |
